# Supplementary material for: Rapidly Switchable Universal CAR-T Cells for Treatment of CD123-Positive Leukemia
Source: PubMed Central journal article supplement (PMC7240059; doi:10.1016/j.omto.2020.04.009), 2020-04-29
Supplement: mmc1.pdf [file mmc1.pdf]

**OMTO, Volume 17**

**Supplemental Information**

**Rapidly Switchable Universal CAR-T Cells  
for Treatment of CD123-Positive Leukemia**

**Simon Loff, Josephine Dietrich, Jan-Erik Meyer, Julia Riewaldt, Johannes Spehr, Malte von Bonin, Cordula Gründer, Mridula Swayampakula, Kristin Franke, Anja Feldmann, Michael Bachmann, Gerhard Ehninger, Armin Ehninger, and Marc Cartellieri**

**Figure S1**

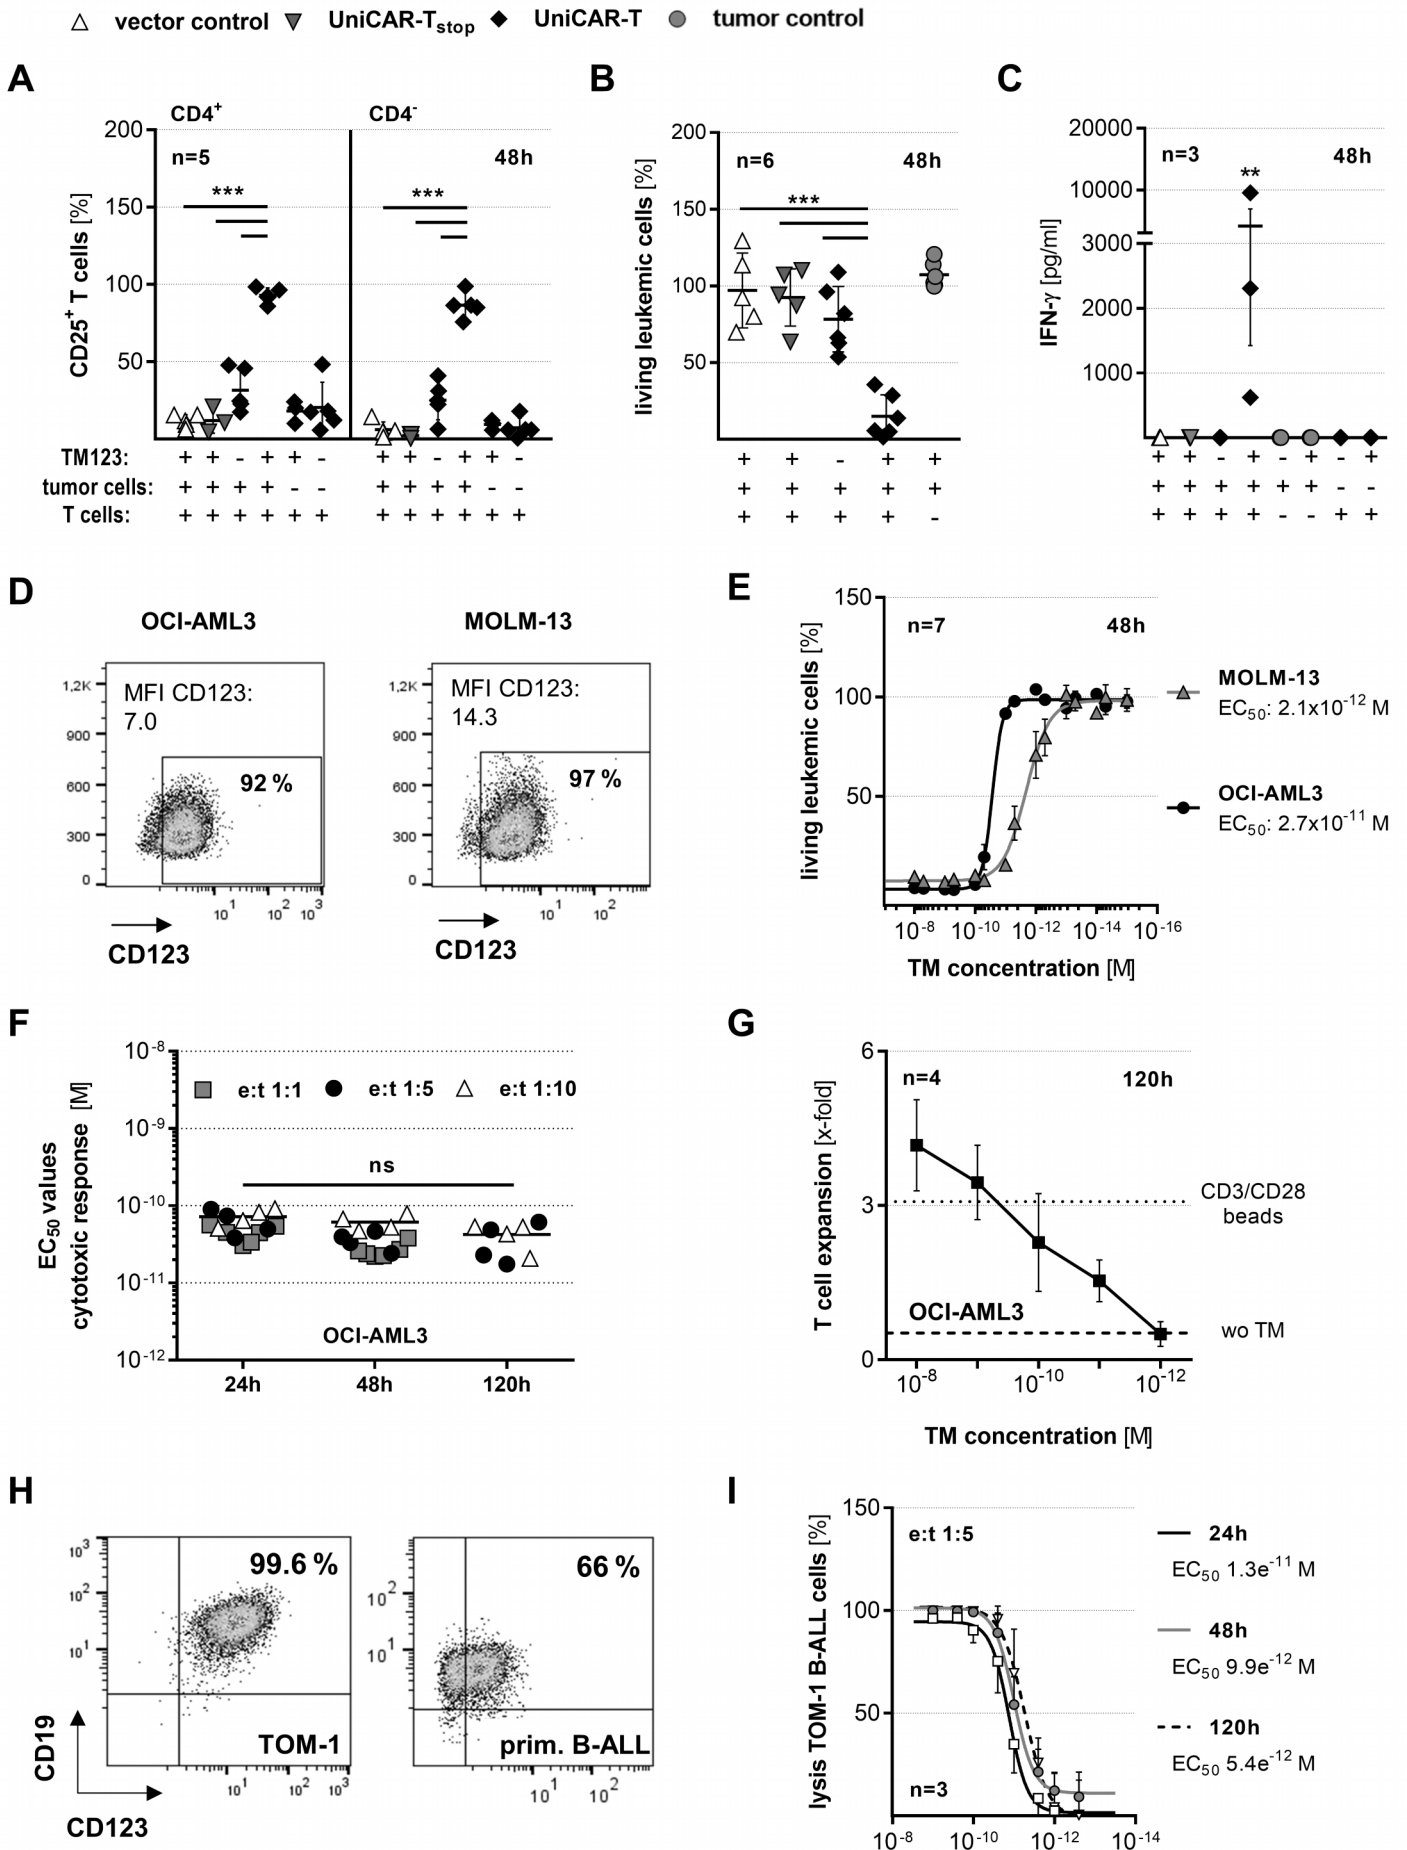

**Figure S2**

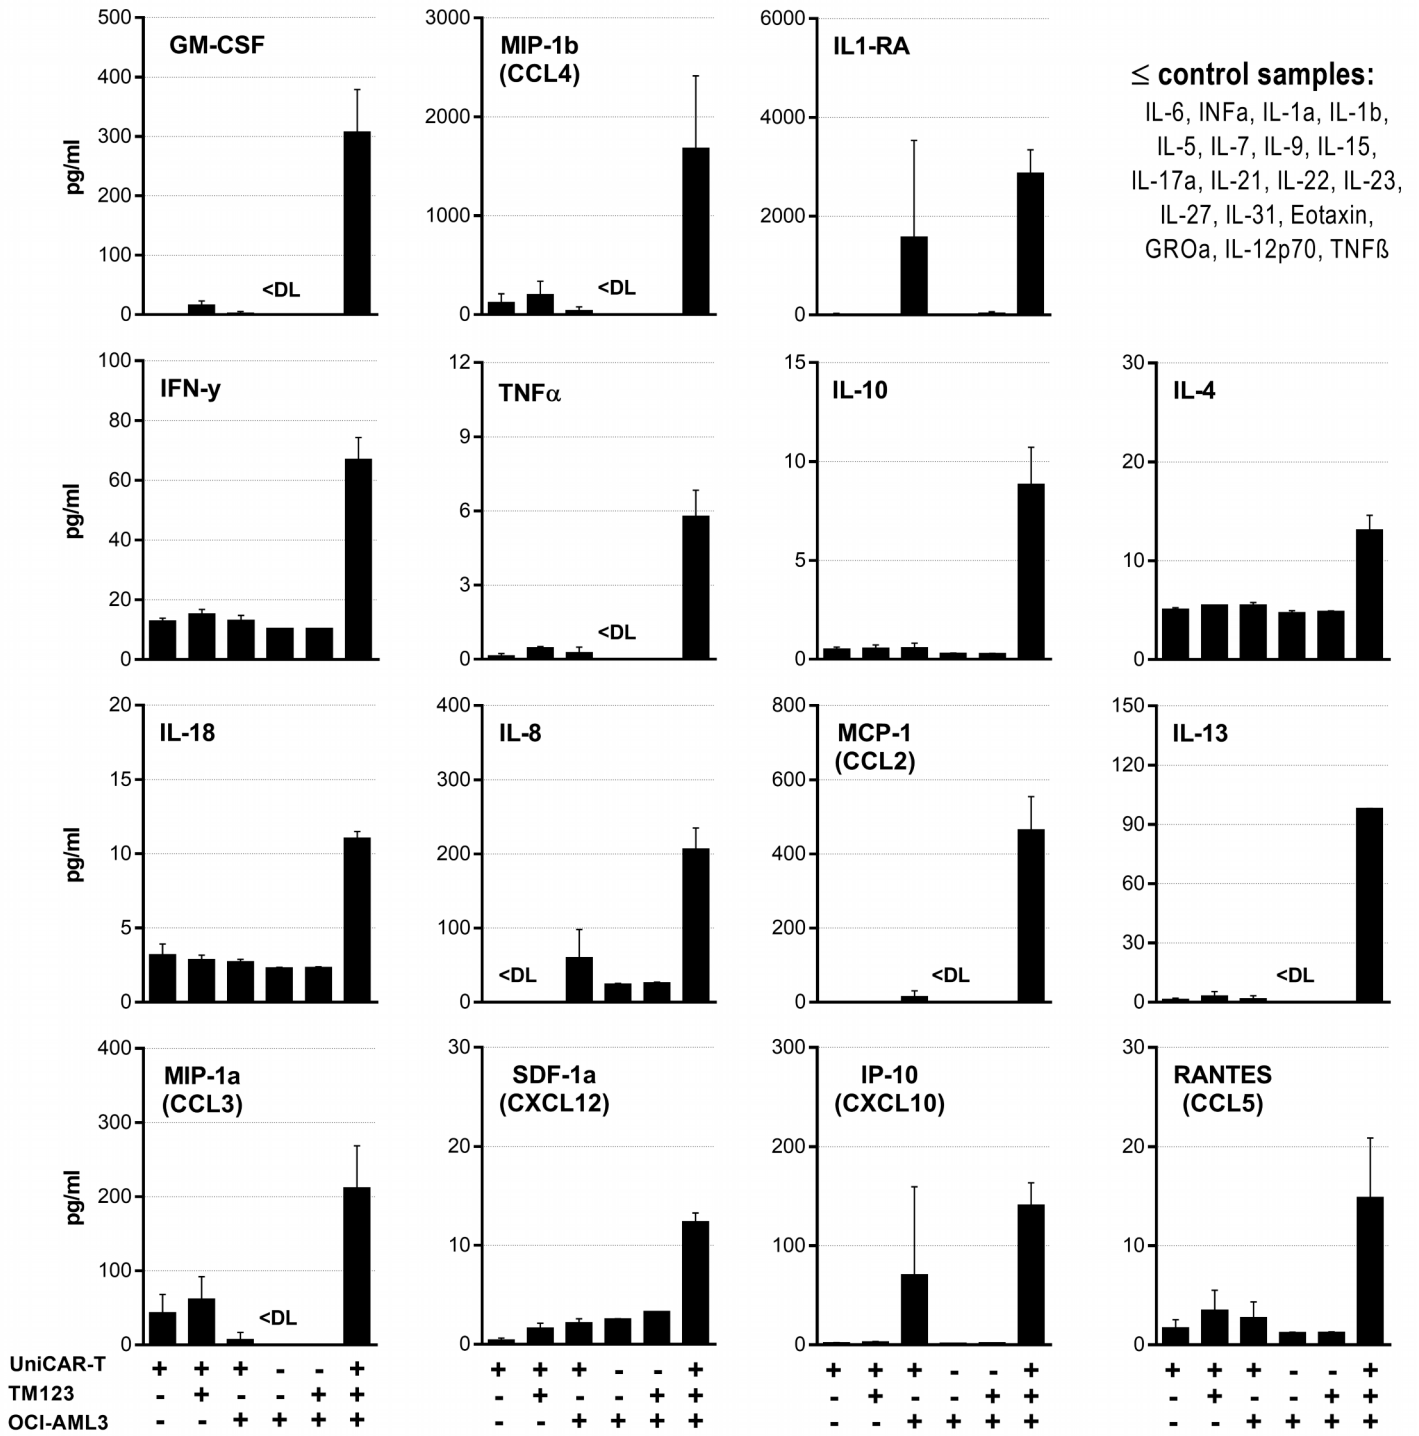

**Figure S3**

**A**

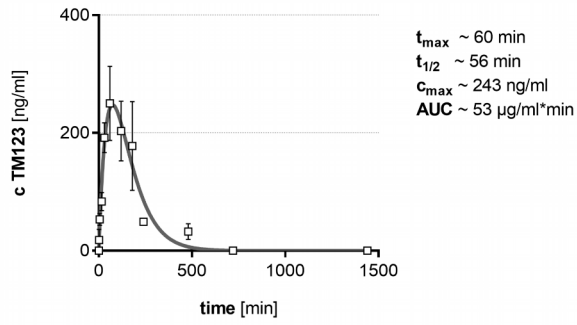

**B**

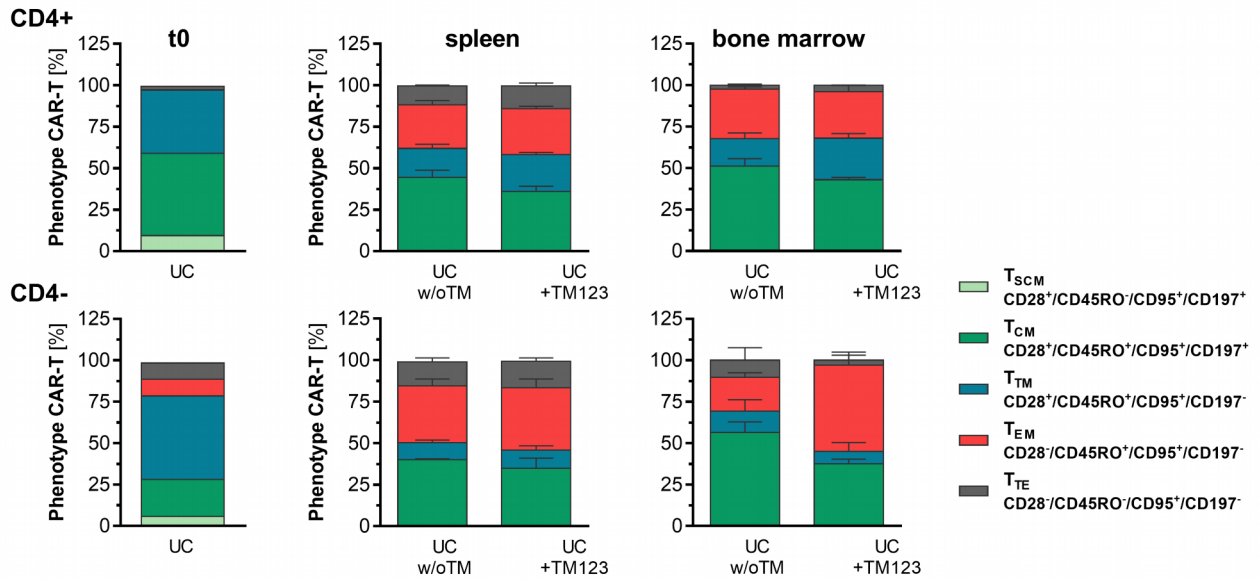

**C**

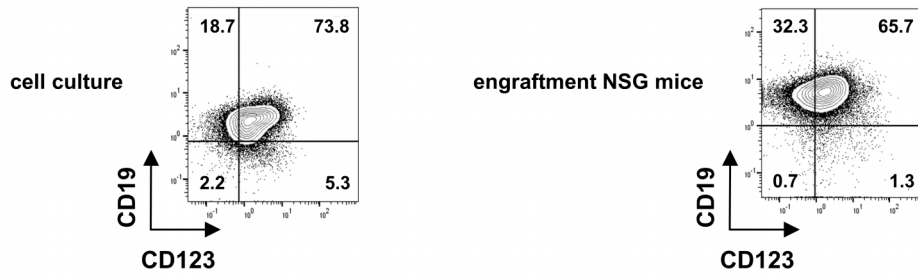

**D**

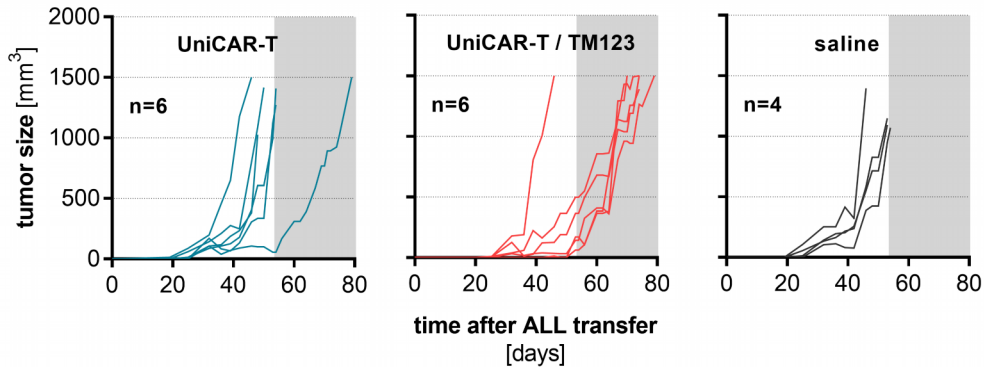

**E**

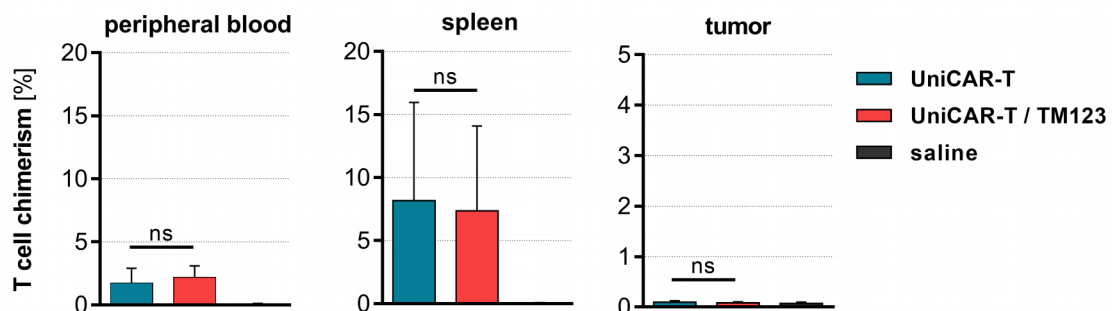

Figure S4

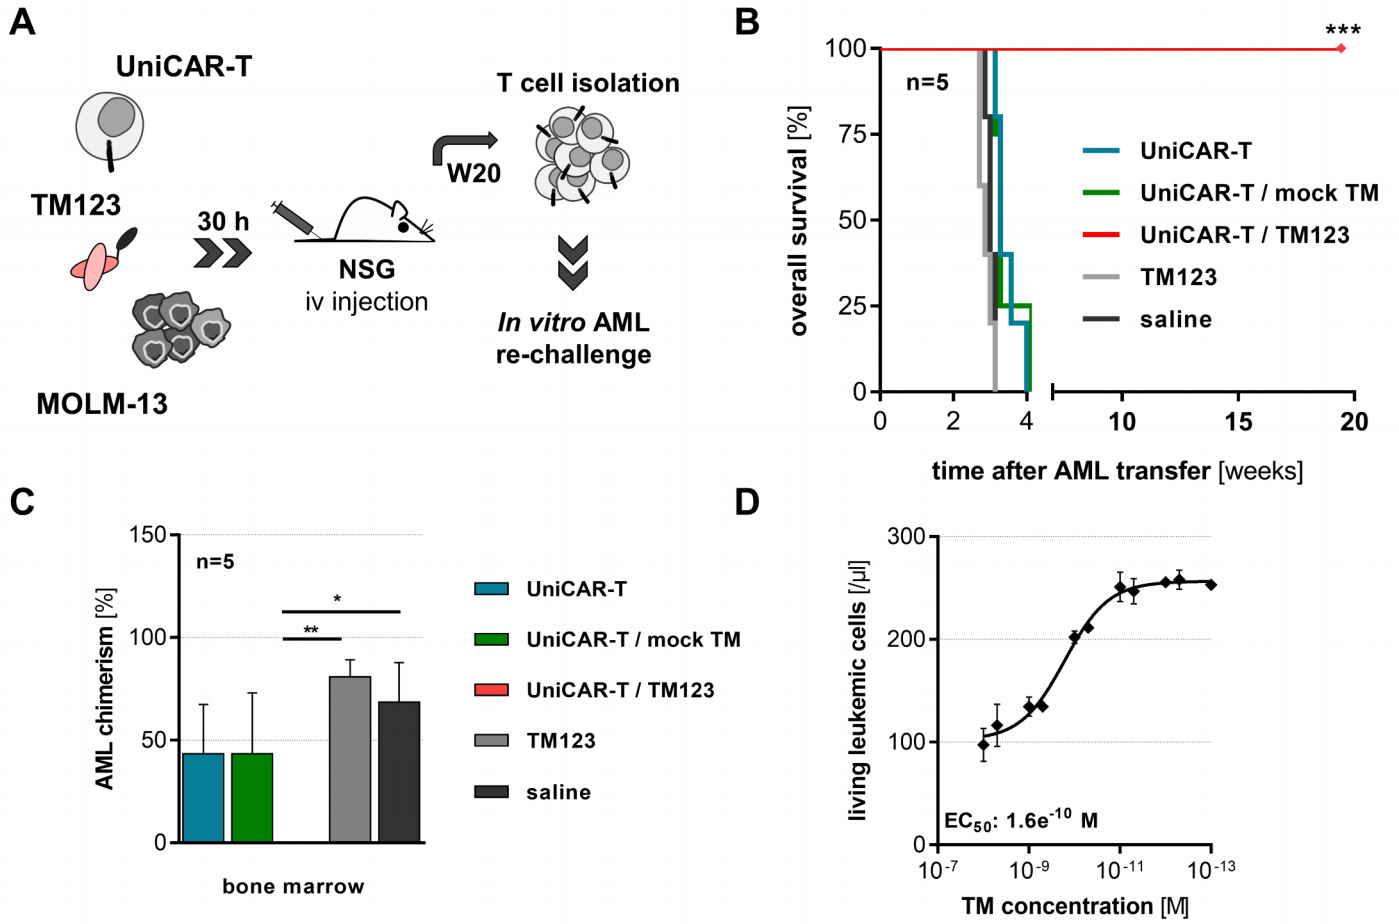

**Figure S5**

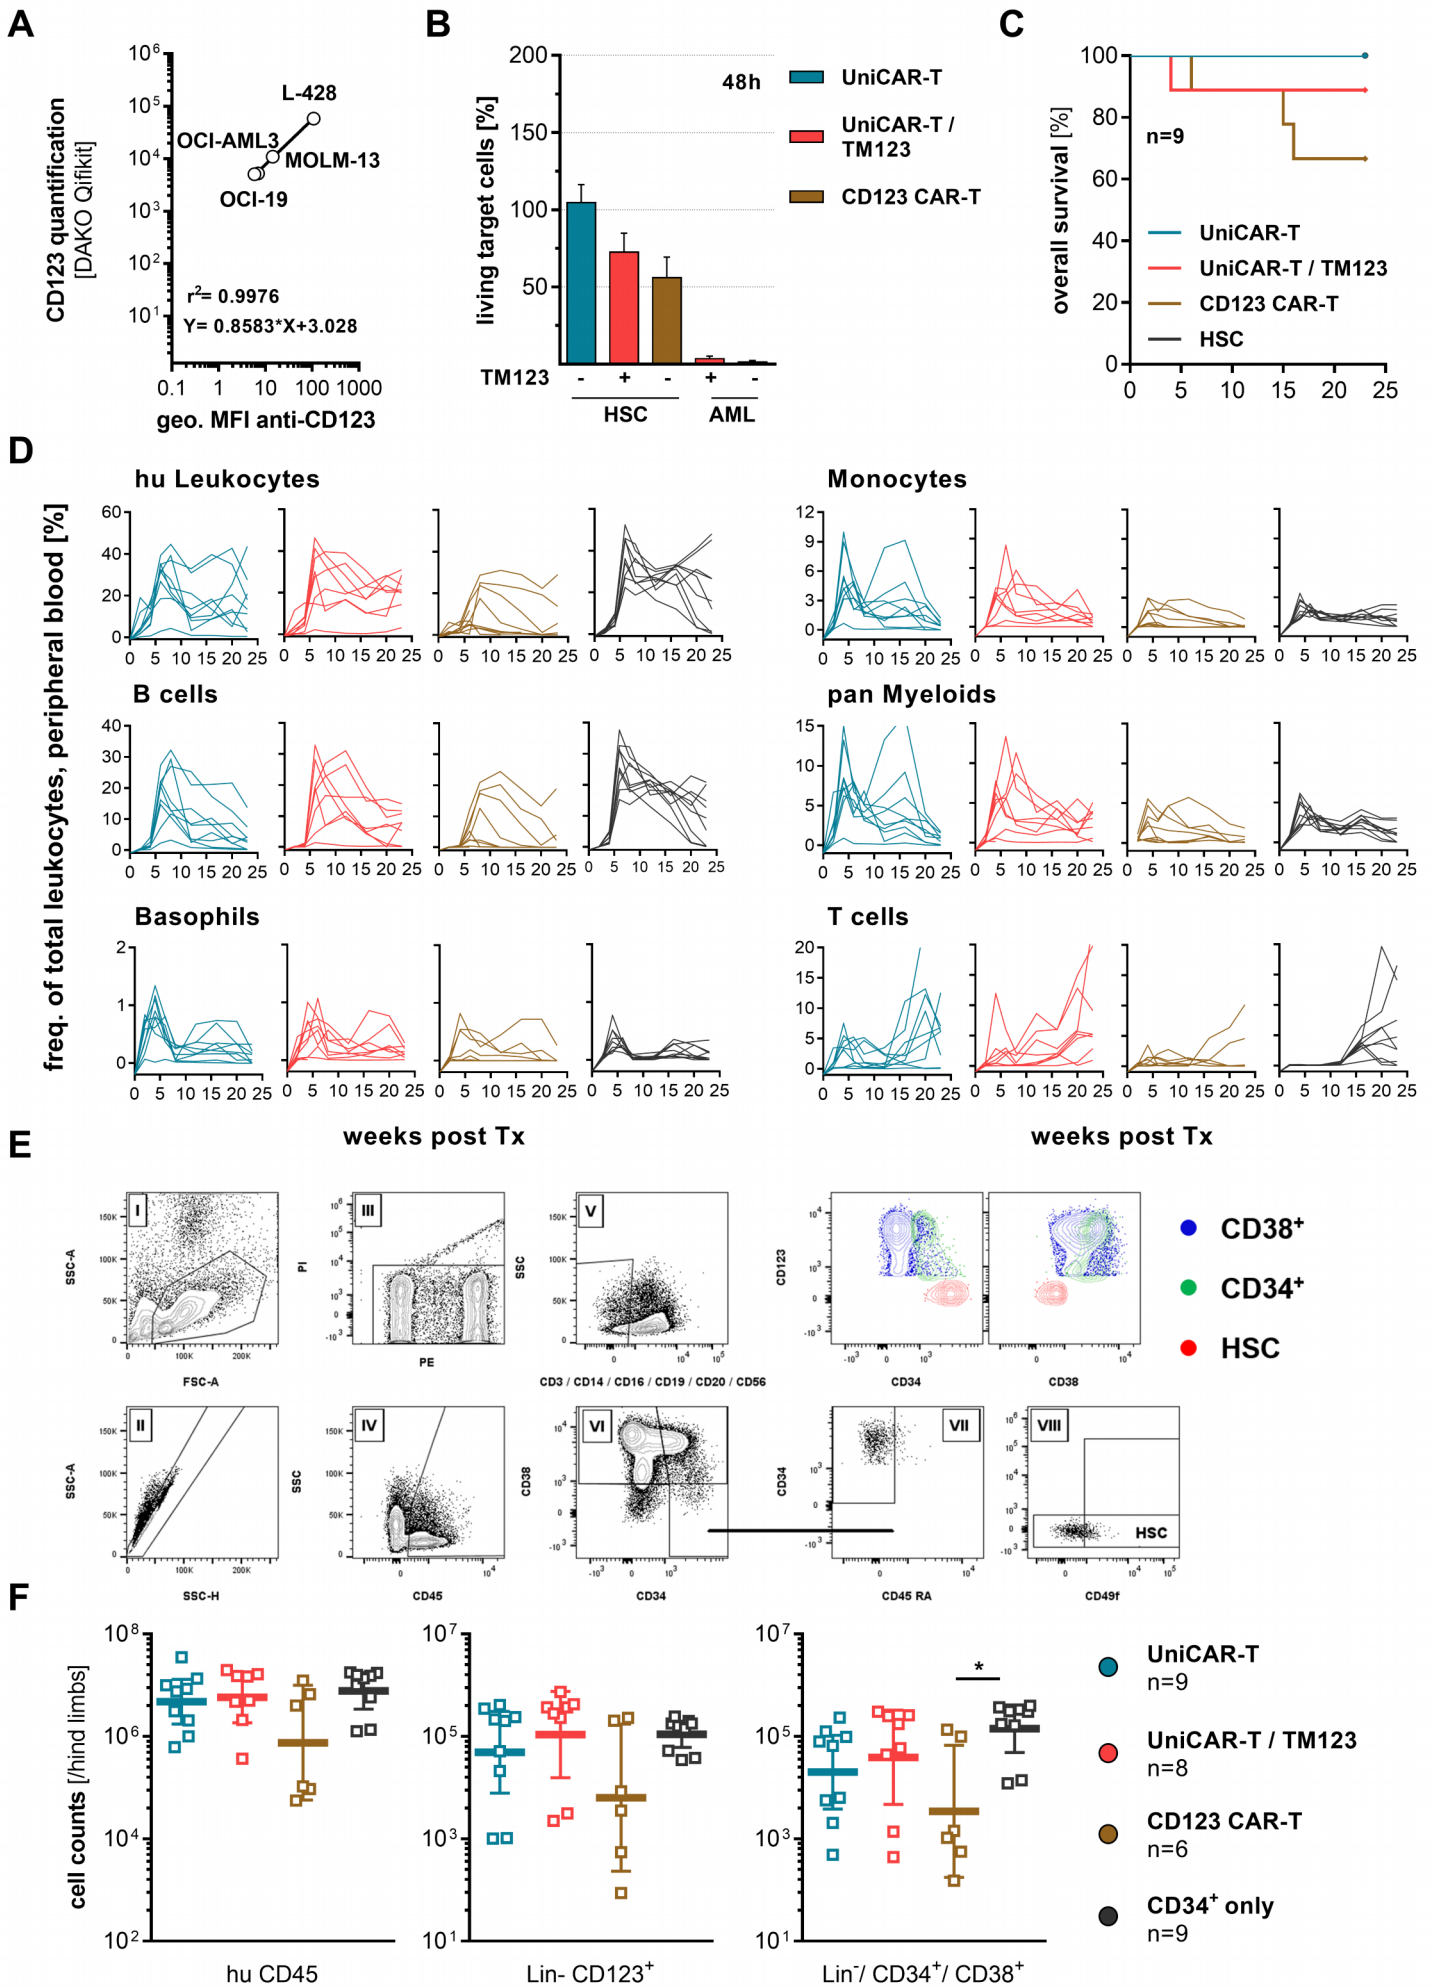

## Supplemental figure legends

**Figure S1. Anti-leukemic response of TM123-redirection UniCAR-T.** Human T cells were genetically engineered to express either functional UniCARs, signalling-deficient UniCARs (UniCAR<sub>stop</sub>) or enhanced green fluorescent protein only (vector control). (A) Induction of the activation marker CD25 on CD4<sup>+</sup> and CD4<sup>-</sup> UniCAR-T ( $2 \times 10^4$ ) cultivated with MOLM-13 at an e:t ratio of 1:1 was determined by flow cytometry after 48 h (mean  $\pm$  SD). (B) Lysis of MOLM-13 cells after 48 h in presence of TM123 normalized to controls lacking UniCAR-T (mean  $\pm$  SD). (C) Release of IFN- $\gamma$  after 48 h co-cultivation of UniCAR-T with MOLM-13 (mean  $\pm$  SEM). (D) CD123 expression on the AML cell lines OCI-AML3 and MOLM-13. (E) EC<sub>50</sub> values for effective cytotoxic responses of TM123-activated UniCAR-T against OCI-AML3 and MOLM-13 after 48 h cultivation (mean  $\pm$  SD). (F) Cytotoxic responses against OCI-AML-3 ( $5 \times 10^4$ ) mediated by decreasing numbers of UniCAR-T (mean). (G) Expansion of UniCAR-T after 120 h cultivation with OCI-AML3 cells at e:t 1:10. UniCAR-induced T cell expansion was compared to expansion-rates upon stimulation with CD3 / CD28 T cell activator beads (mean  $\pm$  SEM). (H) CD123 expression on the B-ALL cell line TOM-1 and primary B-ALL blasts. (I) EC<sub>50</sub> values for effective cytotoxic responses of TM123-activated UniCAR-T against TOM-1 B-ALL cells after 24h, 48h and 120h cultivation (mean  $\pm$  SD). Data was obtained for indicated numbers of T cell donors. Statistical significance for (A), (B), and (F) was assessed by one-way analysis of variance (ANOVA) with *post hoc* Dunnet's multiple comparison test (\*  $P \leq 0.05$ , \*\*  $P \leq 0.01$ , \*\*\*  $P \leq 0.001$ , ns, non-significant).

**Figure S2. Cytokine profile of TM123-redirection UniCAR-T after cultivation with OCI-AML3.** UniCAR-T were cultured together with OCI-AML3 cells in an effector to target cell ratio (e:t) of 1:1 in the presence or absence of 10 nM TM123 for 48 h. Cytokine release was quantified from cell-free culture supernatants using a cytokine-chemokine-34plex analysis. Data was obtained for n=2 independent T cell donors (mean  $\pm$  deviation).

**Figure S3. *In vivo* efficacy of TM123-redirection UniCAR-T against systemic and extramedullary acute leukemia.** (A) In order to determine half-life of TM123, NSG mice were injected intraperitoneally (ip) with 1000 ng/g TM123, normalized to the bodyweight of mice. Peripheral blood samples were taken at indicated time points. Concentration of TM123 was determined via in-house ELISA.<sup>30</sup> (B) Analysis of the UniCAR-T phenotype after the TM123 treatment cycle in the systemic MOLM-13 xenograft model was performed via staining of CD3, CD4, CD28, CD45RO, CD95 and CD197. Resulting T cell subsets were classified as stem cell memory T cells (T<sub>SCM</sub>), central memory T cells (T<sub>CM</sub>), transitional memory T cells (T<sub>TM</sub>), effector memory T cells (T<sub>EM</sub>) and terminal effector T cells (T<sub>TE</sub>) (mean  $\pm$  SEM) according to Mahnke et al. 2013.<sup>36</sup> (C) Subcutaneously (sc) transplanted primary B-ALL blasts retain stable CD123 surface expression in NSG mice. (D) Tumor progression of sc transplanted primary B-ALL monitored for all individual mice. Highlighted regions indicate TM123-free period post tumor-therapy. (E) Analysis of CD3<sup>+</sup> T cell frequencies in peripheral blood, spleen and tumor tissue at the individual end points (mean  $\pm$  SEM). Statistical significance was assessed by nonparametric one-way analysis of variance (ANOVA; Kruskal-Wallis test) with *post hoc* Dunn's multiple comparison test (\*  $P \leq 0.05$ , ns, non-significant).

**Figure S4. TM123-redirection UniCAR-T eliminate acute leukemia in an AML-Winn type assay.** (A) UniCAR-T ( $1 \times 10^5$ ) were pre-incubated with MOLM-13 cells at an effector to target cell (e:t) ratio of 1:1 with or without TM123 for 30 h prior intravenous (iv) transplantation into immunodeficient NSG mice (Winn-assay). Subsequently, isolated T cells were re-challenged with MOLM-13 *in vitro*. (B) Overall survival was monitored for 20 weeks. (C) Significant reduction of leukemic cells in BM after *ex vivo* pre-incubation (Winn-assay) of MOLM-13 with UniCAR-T and 5 nM TM123. (D) After 20 weeks of engraftment in NSG mice purified T cells from spleens were re-challenged with MOLM-13 cells *in vitro*. Anti-tumor response of TM123-redirection UniCAR-T was determined after 48 h at e:t 1:1. Statistical significance was assessed by (B) Kaplan-Meier method with log-rank (Mantel-Cox) or by (C) nonparametric one-way analysis of variance (ANOVA; Kruskal-Wallis test) with *post hoc* Dunn's multiple comparison test (\*  $P \leq 0.05$ , \*\*  $P \leq 0.01$ , \*\*\*  $P \leq 0.001$ ).

**Figure S5. Analysis of human cell engraftment in peripheral blood and bone marrow of humanized NSG mice.** (A) CD123 was quantified on representative cell lines using DAKO Qifikit®. CD123 density on further cell lines, primary cells or patient derived samples was calculated via antigen standard curve. (B) Cytotoxic response of transplanted donor-specific UniCAR-T in presence or absence of 5 nM TM123 and CD123 CAR-T against isolated CD34<sup>+</sup> hematopoietic progenitors or MOLM-13 cells was assessed after 48 h in parallel to the *ex vivo* incubation samples (mean  $\pm$  SD). (C) Overall survival of humanized NSG mice. (D) Human leukocyte subsets in the peripheral blood (PB) of all individual recipient mice. (E) Gating strategy for identification of HSC-enriched cell pools in bone marrow (BM) samples. (F) Absolute numbers of human leukocytes and hematopoietic progenitors per hind limbs (femur + tibia). All samples were analyzed 23 weeks post transplantation. Statistical significance was assessed by parametric one-way analysis of variance (ANOVA) with *post hoc* Dunnet's multiple comparison test (\*  $P \leq 0.05$ ).
